# Supplementary material for: Evaluation of Everolimus Activity against Mycobacterium tuberculosis Using In Vitro Models of Infection
Source: MDPI journal article supplement (doi:10.3390/antibiotics12010171), 2023-01-13
Supplement: s1 [file s1]

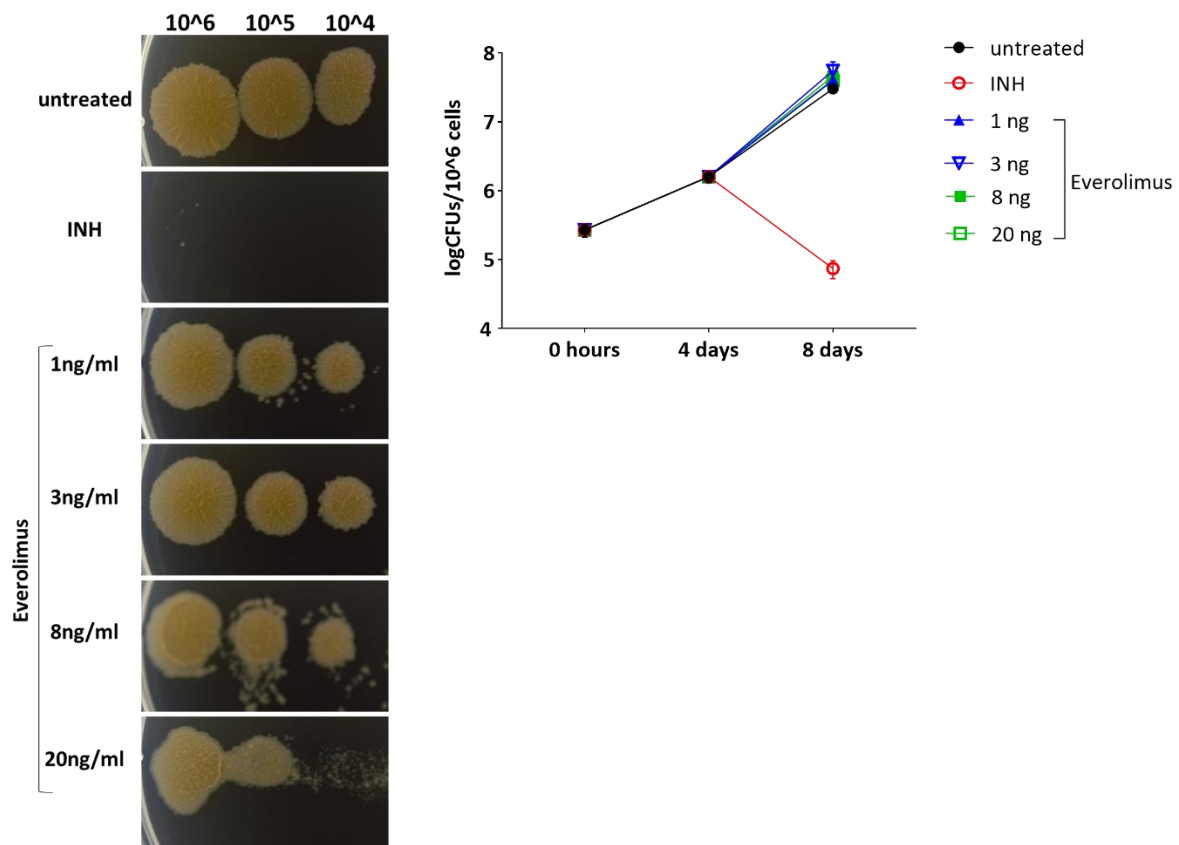

**Supplementary Figure 1. Growth rate of the mycobacterial strains used for the infection modes.** Mycobacterial growth was evaluated plating *Mtb* H37Rv (ranged from  $10^6$  CFUs/ml to  $10^4$  CFUs/ml) on 7H11 solid medium containing Everolimus at final concentrations of 1ng/ml, 3ng/ml, 8ng/ml and 20ng/m or INH (0.2 $\mu$ g/ml). The same Everolimus concentrations were used to assess its immunomodulating activity on ex vivo PBMCs infection model. H37Rv was used to infect peripheral blood mononuclear cells (PBMCs) at MOI = 1:10 with respect to monocytes. Everolimus (1ng/mL, 3ng/m, 8ng/mL and 20ng/mL) and INH (0.2ug/mL) were added four-day post infection. Colony forming units (CFUs) analysis was performed 8-days post infection. CFUs are reported as average  $\pm$  SD in log10 scale.
